# Supplementary material
Source: publisher figshare collection journal article supplement (https://tandf.figshare.com/articles/dataset/_/11907930)
Supplement: Supplementary file 1 [file 1]

Appendix 1a: List of non-native ornamental freshwater fish species (referred to as 'risky' species in text) with native range matches climate of recipient region following the Köppen-Geiger climate classification (Beck et al., 2018). Asterisk denotes potential hybridisation and/or species complex.

| Species name                     | Species native range<br>K-G climate classes | Australia | Belgium<br>(Flanders) | Canada<br>(British Columbia) | China<br>(Guangdong) | Philippines | Poland | Singapore | United Kingdom<br>(England) | United States of<br>America (Florida) | References                                                                                                                                           |
|----------------------------------|---------------------------------------------|-----------|-----------------------|------------------------------|----------------------|-------------|--------|-----------|-----------------------------|---------------------------------------|------------------------------------------------------------------------------------------------------------------------------------------------------|
| <i>Abramites hypselonotus</i>    | A                                           | ✓         |                       |                              |                      |             |        |           |                             |                                       | Department of the<br>Environment, 2014; Froese<br>and Pauly, 2018<br>Froese and Pauly, 2018; Ng<br>and Tan, 2010<br>Witkowski and Grabowska,<br>2012 |
| <i>Acarichthys heckelii</i>      | A                                           |           |                       |                              |                      |             |        | ✓         |                             |                                       |                                                                                                                                                      |
| <i>Acipenser baerii</i>          | D, E                                        |           |                       |                              |                      |             | ✓      |           |                             |                                       |                                                                                                                                                      |
| <i>Acipenser gueldenstaedtii</i> | B, C, D                                     |           | ✓                     |                              |                      |             | ✓      |           | ✓                           |                                       | Witkowski and Grabowska,<br>2012; Britton et al., 2016;<br>Verreycken et al. 2018; Carp<br>Company, 2019                                             |
| <i>Acipenser ruthenus</i>        | B, C, D                                     |           | ✓                     |                              |                      |             | ✓      |           | ✓                           |                                       | Copp et al., 2010; Witkowski<br>and Grabowska, 2012;<br>Britton et al., 2016;<br>Verreycken et al. 2018; Carp<br>Company, 2019                       |
| <i>Acipenser stellatus</i>       | B, C, D                                     |           |                       |                              |                      |             |        |           | ✓                           |                                       |                                                                                                                                                      |
| <i>Alestopetersius caudalis</i>  | A                                           | ✓         |                       |                              |                      |             |        |           |                             |                                       | Department of the<br>Environment, 2014; Froese<br>and Pauly, 2018                                                                                    |
| <i>Amatitlania nigrofasciata</i> | A, C                                        |           |                       |                              |                      | ✓           |        |           |                             | ✓                                     | Guerrero, 2014; Tuckett et<br>al., 2017; Hill and Tuckett,<br>2018; USGS, 2018                                                                       |
| <i>Ambassis ambassis</i>         | A, B, C                                     | ✓         |                       |                              |                      |             |        |           |                             |                                       | Department of the<br>Environment, 2014; Froese<br>and Pauly, 2018                                                                                    |
| <i>Ambassis buruensis</i>        | A                                           | ✓         |                       |                              |                      |             |        |           |                             |                                       | Department of the<br>Environment, 2014; Froese<br>and Pauly, 2018                                                                                    |
| <i>Ambassis elongata</i>         | A                                           | ✓         |                       |                              |                      |             |        |           |                             |                                       | Department of the<br>Environment, 2014; Froese<br>and Pauly, 2018                                                                                    |
| <i>Ambassis gymnocephalus</i>    | A, B, C                                     | ✓         |                       |                              |                      |             |        |           |                             |                                       | Department of the<br>Environment, 2014; Froese<br>and Pauly, 2018                                                                                    |
| <i>Ambassis interrupta</i>       | A                                           | ✓         |                       |                              |                      |             |        |           |                             |                                       | Department of the<br>Environment, 2014; Froese<br>and Pauly, 2018                                                                                    |
| <i>Ambassis kopsii</i>           | A                                           | ✓         |                       |                              |                      |             |        |           |                             |                                       | Department of the<br>Environment, 2014; Froese<br>and Pauly, 2018                                                                                    |
| <i>Ambassis macleayi</i>         | A, B, C                                     | ✓         |                       |                              |                      |             |        |           |                             |                                       | Department of the<br>Environment, 2014; Froese<br>and Pauly, 2018                                                                                    |
| <i>Ambassis nalu</i>             | A, B, C, D                                  | ✓         |                       |                              |                      |             |        |           |                             |                                       | Department of the<br>Environment, 2014; Froese<br>and Pauly, 2018                                                                                    |
| <i>Ambastia sidhimunki</i>       | A                                           | ✓         |                       |                              |                      |             |        |           |                             |                                       | Department of the<br>Environment, 2014; Froese<br>and Pauly, 2018                                                                                    |
| <i>Ameiurus catus</i>            | C, D                                        |           |                       |                              |                      |             |        |           | ✓                           |                                       | Britton and Davies, 2006                                                                                                                             |
| <i>Ameiurus melas</i>            | B, C, D                                     |           |                       |                              |                      |             |        |           | ✓                           |                                       | Copp et al., 2016                                                                                                                                    |
| <i>Amphilophus citrinellus</i>   | A                                           |           |                       |                              |                      |             |        | ✓         |                             | ✓                                     | Froese and Pauly, 2018; Ng<br>and Tan, 2010                                                                                                          |
| <i>Anabas testudineus</i>        | A                                           |           |                       |                              |                      | ✓           |        |           |                             |                                       | Guerrero, 2014                                                                                                                                       |

|                                     |         |   |   |   |   |   |                                                                                                            |
|-------------------------------------|---------|---|---|---|---|---|------------------------------------------------------------------------------------------------------------|
| <i>Andinoacara pulcher</i>          | A, C    | ✓ |   |   |   | ✓ | Department of the Environment, 2014; Froese and Pauly, 2018; USGS, 2018                                    |
| <i>Anostomus anostomus</i>          | A       | ✓ |   |   |   |   | Department of the Environment, 2014; Froese and Pauly, 2018                                                |
| <i>Aphyocharax anisitsi</i>         | A, C    |   | ✓ |   |   | ✓ | Gertzen et al., 2008; DFO, 2018; Froese and Pauly, 2018; USGS, 2018                                        |
| <i>Aphyocharax pusillus</i>         | A       | ✓ |   |   |   |   | Department of the Environment, 2014; Froese and Pauly, 2018                                                |
| <i>Aphyosemion bivittatum</i>       | A       | ✓ |   |   |   |   | Department of the Environment, 2014; Froese and Pauly, 2018                                                |
| <i>Apistogramma agassizii</i>       | A       | ✓ |   |   |   |   | Department of the Environment, 2014; Froese and Pauly, 2018                                                |
| <i>Aplocheilichthys panchax</i>     | A, B, C | ✓ |   |   | ✓ |   | Department of the Environment, 2014; Guerrero, 2014; Froese and Pauly, 2018                                |
| <i>Apteronotus albifrons</i>        | A       | ✓ |   |   |   |   | Department of the Environment, 2014; Froese and Pauly, 2018                                                |
| <i>Apteronotus leptorhynchus</i>    | A, C    | ✓ |   |   |   |   | Department of the Environment, 2014; Froese and Pauly, 2018                                                |
| <i>Arapaima gigas</i>               | A       |   |   |   | ✓ |   | Guerrero, 2014                                                                                             |
| <i>Arnoldichthys spilopterus</i>    | A       | ✓ |   |   |   |   | Department of the Environment, 2014; Froese and Pauly, 2018                                                |
| <i>Astatotilapia calliptera</i>     | A, C    |   |   |   |   | ✓ | USGS, 2018                                                                                                 |
| <i>Astronotus ocellatus</i>         | A, C    | ✓ |   | ✓ |   | ✓ | Ng and Tan, 2010; Hu et al., 2013; Department of the Environment, 2014; Froese and Pauly, 2018; USGS, 2018 |
| <i>Atractosteus spatula</i>         | A, C    |   |   | ✓ |   |   | Hu et al., 2015                                                                                            |
| <i>Aulonocara nyassae</i>           | A       | ✓ |   |   |   |   | Department of the Environment, 2014; Froese and Pauly, 2018                                                |
| <i>Bagrichthys hypselopterus</i>    | A       | ✓ |   |   |   |   | Department of the Environment, 2014; Froese and Pauly, 2018                                                |
| <i>Balantiocheilos melanopterus</i> | A       | ✓ |   |   |   |   | Department of the Environment, 2014; Froese and Pauly, 2018                                                |
| <i>Barbodes everetti</i>            | A       | ✓ |   |   |   |   | Department of the Environment, 2014; Froese and Pauly, 2018                                                |
| <i>Barbodes lateristriga</i>        | A       | ✓ |   |   |   |   | Department of the Environment, 2014; Froese and Pauly, 2018                                                |
| <i>Barbodes semifasciolatus</i>     | A, C    | ✓ |   |   |   | ✓ | Ng and Tan, 2010; Department of the Environment, 2014; Froese and Pauly, 2018                              |
| <i>Barbonymus gonionotus</i>        | A, C    |   |   |   | ✓ |   | Guerrero, 2014; USGS, 2018                                                                                 |
| <i>Barbonymus schwanenfeldii</i>    | A, C    |   | ✓ |   |   | ✓ | Ng and Tan, 2010; Froese and Pauly, 2018; USGS, 2018                                                       |

|                               |         |   |   |   |   |  |  |   |   |                                                                                                                                                                   |
|-------------------------------|---------|---|---|---|---|--|--|---|---|-------------------------------------------------------------------------------------------------------------------------------------------------------------------|
| Baryancistrus xanthellus      | A, B, C |   |   |   | v |  |  |   |   | We i Luo, 2018<br>Department of the Environment, 2014; Froese and Pauly, 2018<br>Lawson et al., 2017; USGS, 2018                                                  |
| Bedotia geayi                 | A       | v |   |   |   |  |  |   |   |                                                                                                                                                                   |
| Belonesox belizanus           | A, B    |   |   |   |   |  |  |   | v | Department of the Environment, 2014; Froese and Pauly, 2018                                                                                                       |
| Benthochromis tricoti         | A       | v |   |   |   |  |  |   |   |                                                                                                                                                                   |
| Betta imbellis                | A       |   |   |   |   |  |  | v |   | Ng and Tan, 2010; Froese and Pauly, 2018                                                                                                                          |
| Betta splendens               | A       | v |   |   |   |  |  | v | v | Ng and Tan, 2010; Froese and Pauly, 2018; USGS, 2018                                                                                                              |
| Boehlkea fredcochui           | A       | v |   |   |   |  |  |   |   | Department of the Environment, 2014; Froese and Pauly, 2018                                                                                                       |
| Boraras maculatus             | A       | v |   |   |   |  |  |   |   | Department of the Environment, 2014; Froese and Pauly, 2018                                                                                                       |
| Botia lohachata               | A, B, C | v |   |   |   |  |  |   |   | Department of the Environment, 2014; Froese and Pauly, 2018                                                                                                       |
| Brachygobius doriae           | A       | v |   |   |   |  |  |   |   | Department of the Environment, 2014; Froese and Pauly, 2018                                                                                                       |
| Brachygobius sabanus          | A       |   |   |   |   |  |  | v |   | Ng and Tan, 2010; Froese and Pauly, 2018                                                                                                                          |
| Brevibora dorsiocellata       | A       | v |   |   |   |  |  |   |   | Department of the Environment, 2014; Froese and Pauly, 2018                                                                                                       |
| Brycinus longipinnis          | A       | v |   |   |   |  |  |   |   | Department of the Environment, 2014; Froese and Pauly, 2018                                                                                                       |
| Callichthys callichthys       | A, C    |   |   |   |   |  |  |   | v | USGS, 2018                                                                                                                                                        |
| Campylomormyrus cassaicus     | A       | v |   |   |   |  |  |   |   | Department of the Environment, 2014; Froese and Pauly, 2018                                                                                                       |
| Campylomormyrus rhynchophorus | A       | v |   |   |   |  |  |   |   | Department of the Environment, 2014; Froese and Pauly, 2018                                                                                                       |
| Carassius auratus             | B, C, D | v | v | v | v |  |  | v | v | Taylor, 2004; Verreycken et al., 2007; Witkowski and Grabowska, 2012; Hu et al., 2013; Copp, et al., 2015; Rixon et al., 2015; Froese and Pauly, 2018; USGS, 2018 |
| Carnegiella strigata          | A       | v |   |   |   |  |  |   |   | Department of the Environment, 2014; Froese and Pauly, 2018                                                                                                       |
| Chalinochromis brichardi      | A       | v |   |   |   |  |  |   |   | Department of the Environment, 2014; Froese and Pauly, 2018                                                                                                       |
| Chanda nama                   | A, C    | v |   |   |   |  |  |   |   | Department of the Environment, 2014; Froese and Pauly, 2018                                                                                                       |
| Channa micropeltes            | A       |   |   |   |   |  |  | v |   | Ng and Tan, 2010; Guerrero 2014; Froese and Pauly, 2018                                                                                                           |
| Characidium laterale          | A       | v |   |   |   |  |  |   |   | Department of the Environment, 2014; Froese and Pauly, 2018                                                                                                       |

|                                 |         |   |   |   |   |   |                                                                                                                                  |
|---------------------------------|---------|---|---|---|---|---|----------------------------------------------------------------------------------------------------------------------------------|
| <i>Chilodus punctatus</i>       | A       | ✓ |   |   |   |   | Department of the Environment, 2014; Froese and Pauly, 2018                                                                      |
| <i>Chilotilapia rhoadesii</i>   | A       | ✓ |   |   |   |   | Department of the Environment, 2014; Froese and Pauly, 2018                                                                      |
| <i>Chitala chitala</i>          | A, B, C |   | ✓ | ✓ |   |   | Hu et al., 2013; Guerrero, 2014                                                                                                  |
| <i>Chitala ornata</i>           | A       |   |   | ✓ | ✓ | ✓ | Ng and Tan, 2010; Guerrero, 2014; Froese and Pauly, 2018; USGS, 2018                                                             |
| <i>Chromobotia macracanthus</i> | A       | ✓ |   |   |   |   | Department of the Environment, 2014; Froese and Pauly, 2018                                                                      |
| <i>Chrosomus neogaeus</i>       | C, D    |   | ✓ |   |   |   | Scott and Crossman, 1973; Mandrak et al. 2014; Ministry of Environment and Climate Change Strategy, 2017; Froese and Pauly, 2018 |
| <i>Cichla ocellaris</i>         | A       |   |   | ✓ |   |   | Guerrero, 2014                                                                                                                   |
| <i>Cichla orinocensis</i>       | A       |   |   |   | ✓ |   | Ng and Tan, 2010; Froese and Pauly, 2018                                                                                         |
| <i>Cichla temensis</i>          | A       |   |   |   | ✓ |   | Liew et al., 2012; Froese and Pauly, 2018                                                                                        |
| <i>Cichlasoma bimaculatum</i>   | A       |   |   |   |   | ✓ | USGS, 2018                                                                                                                       |
| <i>Cichlasoma urophthalmum</i>  | A       |   |   |   | ✓ |   | Ng and Tan, 2010                                                                                                                 |
| <i>Clarias batrachus</i> *      | A, C    |   |   | ✓ |   | ✓ | Guerrero, 2014; USGS, 2018                                                                                                       |
| <i>Clarias gariepinus</i>       | A, B    |   |   |   | ✓ |   | Ng and Tan, 2010; Froese and Pauly, 2018                                                                                         |
| <i>Cleithracara maronii</i>     | A       | ✓ |   |   |   |   | Department of the Environment, 2014; Froese and Pauly, 2018                                                                      |
| <i>Cobitis taenia</i>           | B, C, D |   | ✓ |   |   |   | Mandrak et al., 2014; Froese and Pauly, 2018                                                                                     |
| <i>Colossoma macropomum</i>     | A       |   |   |   |   | ✓ | USGS, 2018                                                                                                                       |
| <i>Copeina guttata</i>          | A       | ✓ |   |   |   |   | Department of the Environment, 2014; Froese and Pauly, 2018                                                                      |
| <i>Copella arnoldi</i>          | A       | ✓ |   |   |   |   | Department of the Environment, 2014; Froese and Pauly, 2018                                                                      |
| <i>Coptodon zillii</i>          | A, B, C |   |   |   |   | ✓ | USGS, 2018                                                                                                                       |
| <i>Corydoras aeneus</i> *       | A, C    |   | ✓ |   |   | ✓ | DFO, 2018; Froese and Pauly, 2018; USGS, 2018                                                                                    |
| <i>Corydoras geoffroy</i>       | A       | ✓ |   |   |   |   | Department of the Environment, 2014; Froese and Pauly, 2018                                                                      |
| <i>Corydoras paleatus</i>       | C, E    |   | ✓ |   |   |   | DFO, 2018; Froese and Pauly, 2018                                                                                                |
| <i>Corydoras splendens</i>      | A       | ✓ |   |   |   |   | Department of the Environment, 2014; Froese and Pauly, 2018                                                                      |
| <i>Corynopoma riisei</i>        | A       | ✓ |   |   |   |   | Department of the Environment, 2014; Froese and Pauly, 2018                                                                      |
| <i>Crossocheilus oblongus</i>   | A       | ✓ |   |   |   |   | Department of the Environment, 2014; Froese and Pauly, 2018                                                                      |
| <i>Ctenopharyngodon idella</i>  | C, D    |   |   |   |   | ✓ | Copp et al., 2010; Carp Company, 2019                                                                                            |

|                                 |         |   |   |   |   |   |   |   |   |   |                                                                                                                                          |
|---------------------------------|---------|---|---|---|---|---|---|---|---|---|------------------------------------------------------------------------------------------------------------------------------------------|
| <i>Cyathopharynx furcifer</i>   | A       | ✓ |   |   |   |   |   |   |   |   | Department of the Environment, 2014; Froese and Pauly, 2018                                                                              |
| <i>Cyphotilapia frontosa</i>    | A       | ✓ |   |   |   |   |   |   |   |   | Department of the Environment, 2014; Froese and Pauly, 2018                                                                              |
| <i>Cyprichromis leptosoma</i>   | A       | ✓ |   |   |   |   |   |   |   |   | Department of the Environment, 2014; Froese and Pauly, 2018                                                                              |
| <i>Cyprinella lutrensis</i>     | B, C, D |   |   | ✓ |   |   |   | ✓ |   |   | Mandrak et al., 2014; Froese and Pauly, 2018                                                                                             |
| <i>Cyprinus carpio</i>          | B, C, D |   | ✓ | ✓ | ✓ |   | ✓ |   | ✓ | ✓ | Taylor, 2004; Copp et al., 2007; Verreycken et al., 2007; Witkowski and Grabowska, 2012; Hu et al., 2013; Rixon et al., 2015; USGS, 2018 |
| <i>Cyrtocara moorii</i>         | A       | ✓ |   |   |   |   |   |   |   |   | Department of the Environment, 2014; Froese and Pauly, 2018                                                                              |
| <i>Danio albolineatus</i>       | A, C    | ✓ |   |   |   |   |   | ✓ |   |   | Ng and Tan, 2010; Froese and Pauly, 2018                                                                                                 |
| <i>Danio kerri</i>              | A       | ✓ |   |   |   |   |   |   |   |   | Department of the Environment, 2014; Froese and Pauly, 2018                                                                              |
| <i>Danio nigrofasciatus</i>     | A       | ✓ |   |   |   |   |   |   |   |   | Department of the Environment, 2014; Froese and Pauly, 2018                                                                              |
| <i>Danio rerio</i>              | A, B, C | ✓ |   |   | ✓ | ✓ |   |   |   | ✓ | Hu et al., 2013; Guerrero, 2014; Tuckett et al., 2017; Froese and Pauly, 2018;                                                           |
| <i>Danio roseus</i>             | A, C    |   |   |   |   |   |   |   |   | ✓ | USGS, 2018                                                                                                                               |
| <i>Dasylicarica filamentosa</i> | A       | ✓ |   |   |   |   |   |   |   |   | Tuckett et al., 2017                                                                                                                     |
| <i>Dawkinsia arulius</i>        | A       | ✓ |   |   |   |   |   |   |   |   | Department of the Environment, 2014; Froese and Pauly, 2018                                                                              |
| <i>Dawkinsia filamentosa</i>    | A, B, C | ✓ |   |   |   |   |   |   |   |   | Department of the Environment, 2014; Froese and Pauly, 2018                                                                              |
| <i>Dekeyseria pulchra</i>       | A       | ✓ |   |   |   |   |   |   |   |   | Department of the Environment, 2014; Froese and Pauly, 2018                                                                              |
| <i>Dermogenys pusilla</i>       | A       | ✓ |   |   |   |   |   |   |   |   | Department of the Environment, 2014; Froese and Pauly, 2018                                                                              |
| <i>Desmopuntius hexazona</i>    | A       | ✓ |   |   |   |   |   |   |   |   | Department of the Environment, 2014; Froese and Pauly, 2018                                                                              |
| <i>Desmopuntius pentazona</i>   | A       | ✓ |   |   |   |   |   |   |   |   | Department of the Environment, 2014; Froese and Pauly, 2018                                                                              |
| <i>Devatio aequipinnatus</i>    | A, C    |   |   |   |   |   |   |   |   | ✓ | Tuckett et al., 2017; Hill and Tuckett, 2018                                                                                             |
| <i>Devatio devatio</i>          | A, C    | ✓ |   |   |   |   |   |   |   |   | Department of the Environment, 2014; Froese and Pauly, 2018                                                                              |
| <i>Devatio malabaricus</i>      | A       | ✓ |   |   |   |   |   |   |   | ✓ | Froese and Pauly, 2018; USGS, 2018                                                                                                       |
| <i>Dianema urostriatum</i>      | A       | ✓ |   |   |   |   |   |   |   |   | Department of the Environment, 2014; Froese and Pauly, 2018                                                                              |

|                                    |            |   |  |   |   |                                                                      |
|------------------------------------|------------|---|--|---|---|----------------------------------------------------------------------|
| <i>Dicrossus filamentosus</i>      | A          | ✓ |  |   |   | Department of the Environment, 2014; Froese and Pauly, 2018          |
| <i>Dicrossus maculatus</i>         | A          | ✓ |  |   |   | Department of the Environment, 2014; Froese and Pauly, 2018          |
| <i>Ectreopopterus uruguayensis</i> | A          | ✓ |  |   |   | Department of the Environment, 2014; Froese and Pauly, 2018          |
| <i>Epalzeorhynchus bicolor</i>     | A          | ✓ |  |   |   | Department of the Environment, 2014; Froese and Pauly, 2018          |
| <i>Epalzeorhynchus frenatus</i>    | A          | ✓ |  |   |   | Department of the Environment, 2014; Froese and Pauly, 2018          |
| <i>Epalzeorhynchus kalopterus</i>  | A          | ✓ |  |   |   | Department of the Environment, 2014; Froese and Pauly, 2018          |
| <i>Epalzeorhynchus munense</i>     | A          | ✓ |  |   |   | Department of the Environment, 2014; Froese and Pauly, 2018          |
| <i>Epiplatys sexfasciatus</i>      | A          | ✓ |  |   |   | Department of the Environment, 2014; Froese and Pauly, 2018          |
| <i>Eretmodus cyanostictus</i>      | A          | ✓ |  |   |   | Department of the Environment, 2014; Froese and Pauly, 2018          |
| <i>Esomus malayensis</i>           | A          | ✓ |  |   |   | Department of the Environment, 2014; Froese and Pauly, 2018          |
| <i>Esomus metallicus</i>           | A          |   |  |   | ✓ | Ng and Tan, 2010; Froese and Pauly, 2018                             |
| <i>Etroplus suratensis</i>         | A          |   |  |   | ✓ | Ng and Tan, 2010; Froese and Pauly, 2018                             |
| <i>Farlowella acus</i>             | A          | ✓ |  |   |   | Department of the Environment, 2014; Froese and Pauly, 2018          |
| <i>Farlowella vittata</i>          | A, C       |   |  |   |   | USGS, 2018                                                           |
| <i>Fundulus cingulatus</i>         | C          |   |  | ✓ |   | Hu et al., 2013                                                      |
| <i>Gambusia affinis</i>            | A, B, C, D |   |  | ✓ | ✓ | Ng and Tan, 2010; Guerrero, 2014; Froese and Pauly, 2018; USGS, 2018 |
| <i>Garra rufa</i>                  | B, C, D    |   |  | ✓ |   | DFO, 2018; Froese and Pauly, 2018                                    |
| <i>Gasteropelecus sternicla</i>    | A          | ✓ |  |   |   | Department of the Environment, 2014; Froese and Pauly, 2018          |
| <i>Geophagus altifrons</i>         | A          |   |  |   | ✓ | Ng and Tan, 2010; Froese and Pauly, 2018                             |
| <i>Geophagus surinamensis</i>      | A          |   |  |   |   | USGS, 2018                                                           |
| <i>Glossolepis incisus</i>         | A          | ✓ |  |   |   | Department of the Environment, 2014; Froese and Pauly, 2018          |
| <i>Gnathochromis permaxillaris</i> | A          | ✓ |  |   |   | Department of the Environment, 2014; Froese and Pauly, 2018          |
| <i>Gnathonemus petersii</i>        | A, B       | ✓ |  |   |   | Department of the Environment, 2014; Froese and Pauly, 2018          |
| <i>Gymnocorymbus bondi</i>         | A          | ✓ |  |   |   | Department of the Environment, 2014; Froese and Pauly, 2018          |

|                                  |         |   |   |   |   |                                                                                                          |
|----------------------------------|---------|---|---|---|---|----------------------------------------------------------------------------------------------------------|
| <i>Gymnocorymbus ternetzi</i>    | A, B, C | ✓ | ✓ | ✓ | ✓ | Rixon et al., 2005; Hu et al., 2013; Tuckett et al., 2017; DFO, 2018; Froese and Pauly, 2018; USGS, 2018 |
| <i>Gymnocorymbus thayeri</i>     | A       | ✓ |   |   |   | Department of the Environment, 2014; Froese and Pauly, 2018                                              |
| <i>Gymnogeophagus balzanii</i>   | A, B, C |   | ✓ |   |   | DFO, 2018; Froese and Pauler, 2018                                                                       |
| <i>Gyrinocheilus aymonieri</i>   | A       | ✓ |   |   |   | Department of the Environment, 2014; Froese and Pauly, 2018                                              |
| <i>Haludaria fasciata</i>        | A       | ✓ |   |   |   | Department of the Environment, 2014; Froese and Pauly, 2018                                              |
| <i>Hasemania nana</i>            | A       | ✓ |   |   |   | Department of the Environment, 2014; Froese and Pauly, 2018                                              |
| <i>Helostoma temminckii</i>      | A       | ✓ |   |   | ✓ | Guerrero, 2014; Tuckett et al., 2017; Froese and Pauly, 2018; USGS, 2018                                 |
| <i>Hemichromis bimaculatus</i>   | A       |   |   |   | ✓ | Guerrero, 2014                                                                                           |
| <i>Hemichromis letourneuxi</i>   | A, B    |   |   |   |   | USGS, 2018                                                                                               |
| <i>Hemigrammus unilineatus</i>   | A       | ✓ |   |   |   | Department of the Environment, 2014; Froese and Pauly, 2018                                              |
| <i>Hemiodus sterni</i>           | A       | ✓ |   |   |   | Department of the Environment, 2014; Froese and Pauly, 2018                                              |
| <i>Herichthys carpintis</i>      | A, B, C |   |   | ✓ |   | ✓ Hu et al., 2013; USGS, 2018                                                                            |
| <i>Herichthys cyanoguttatus</i>  | A, B, C |   |   |   |   | ✓ USGS, 2018                                                                                             |
| <i>Heros severus</i>             | A       |   |   |   |   | ✓ USGS, 2018                                                                                             |
| <i>Heterotilapia buttikoferi</i> | A       |   |   |   |   | ✓ USGS, 2018                                                                                             |
| <i>Homaloptera orthogoniata</i>  | A       | ✓ |   |   |   | Department of the Environment, 2014; Froese and Pauly, 2018                                              |
| <i>Hoplias malabaricus</i>       | A, C    |   |   |   |   | ✓ USGS, 2018                                                                                             |
| <i>Hoplosternum littorale</i>    | A, C    |   |   |   |   | ✓ USGS, 2018                                                                                             |
| <i>Hyphessobrycon anisitsi</i>   | A, B, C |   | ✓ |   |   | DFO, 2018; Froese and Pauler, 2018                                                                       |
| <i>Hyphessobrycon compressus</i> | A, B, C | ✓ |   |   |   | Department of the Environment, 2014; Froese and Pauly, 2018                                              |
| <i>Hyphessobrycon eques*</i>     | A, C    |   |   |   |   | ✓ Tuckett et al., 2017; USGS, 2018                                                                       |
| <i>Hypostomus punctatus</i>      | A, C    |   |   | ✓ |   | Li et al., 2013                                                                                          |
| <i>Hypsophrys nicaraguensis</i>  | A       | ✓ |   |   |   | Department of the Environment, 2014; Froese and Pauly, 2018                                              |
| <i>Ictalurus punctatus</i>       | B, C, D |   | ✓ |   | ✓ | Zięba et al., 2010; Mandrak et al., 2014; Froese and Pauler, 2018; USGS, 2018                            |
| <i>Ictiobus cyprinellus</i>      | B, C, D |   | ✓ |   |   | Mandrak et al., 2014; Froese and Pauler, 2018                                                            |
| <i>Inpaichthys kerri</i>         | A       | ✓ |   |   |   | Department of the Environment, 2014; Froese and Pauly, 2018                                              |
| <i>Iodotropheus sprengerae</i>   | A       | ✓ |   |   |   | Department of the Environment, 2014; Froese and Pauly, 2018                                              |

|                                     |         |   |   |   |   |   |                                                                                                          |
|-------------------------------------|---------|---|---|---|---|---|----------------------------------------------------------------------------------------------------------|
| <i>Julidochromis ornatus</i>        | A       | ✓ |   |   |   |   | Department of the Environment, 2014; Froese and Pauly, 2018                                              |
| <i>Kryptopterus bicirrhis</i>       | A       | ✓ |   |   |   |   | Department of the Environment, 2014; Froese and Pauly, 2018                                              |
| <i>Kryptopterus macrocephalus</i>   | A       | ✓ |   |   |   |   | Department of the Environment, 2014; Froese and Pauly, 2018                                              |
| <i>Labeo chrysophekadion</i>        | A       | ✓ |   |   |   |   | Department of the Environment, 2014; Froese and Pauly, 2018                                              |
| <i>Labeo cyclorhynchus</i>          | A       | ✓ |   |   |   |   | Department of the Environment, 2014; Froese and Pauly, 2018                                              |
| <i>Laetacara curviceps</i>          | A       | ✓ |   |   |   |   | Department of the Environment, 2014; Froese and Pauly, 2018                                              |
| <i>Laetacara dorsigera</i>          | A       | ✓ |   |   |   |   | Department of the Environment, 2014; Froese and Pauly, 2018                                              |
| <i>Lamprologus ocellatus</i>        | A       | ✓ |   |   |   |   | Department of the Environment, 2014; Froese and Pauly, 2018                                              |
| <i>Laubuka laubuca</i>              | A       | ✓ |   |   |   |   | Department of the Environment, 2014; Froese and Pauly, 2018                                              |
| <i>Leiarius marmoratus</i>          | A       |   |   |   |   | ✓ | USGS, 2018                                                                                               |
| <i>Lepidarchus adonis</i>           | A       | ✓ |   |   |   |   | Department of the Environment, 2014; Froese and Pauly, 2018                                              |
| <i>Lepidolamprologus meeli</i>      | A       | ✓ |   |   |   |   | Department of the Environment, 2014; Froese and Pauly, 2018                                              |
| <i>Lepidocephalichthys lorentzi</i> | A       | ✓ |   |   |   |   | Department of the Environment, 2014; Froese and Pauly, 2018                                              |
| <i>Lepisosteus oculatus</i>         | B, C, D |   |   | ✓ |   |   | Mandrak et al., 2014; Froese and Pauler, 2018                                                            |
| <i>Lepisosteus osseus</i>           | B, C, D |   |   | ✓ | ✓ |   | Scott and Crossman, 1973; Mandrak et al., 2014; Hu et al., 2015; Froese and Pauler, 2018; USGS, 2018     |
| <i>Lepomis gibbosus</i>             | B, C, D |   | ✓ |   |   | ✓ | Copp and Fox, 2007; Verreycken et al., 2007; Witkowski and Grabowska, 2012                               |
| <i>Lepomis macrochirus</i>          | B, C, D |   |   | ✓ |   |   | Mandrak et al., 2014; Ministry of Environment and Climate Change Strategy, 2017; Froese and Pauler, 2018 |
| <i>Lepomis megalotis</i>            | B, C, D |   |   | ✓ |   |   | Mandrak et al., 2014; Froese and Pauler, 2018; USGS, 2018                                                |
| <i>Leporinus arcus</i>              | A       | ✓ |   |   |   |   | Department of the Environment, 2014; Froese and Pauly, 2018                                              |
| <i>Leporinus fasciatus</i>          | A       | ✓ |   |   |   | ✓ | Department of the Environment, 2014; Froese and Pauly, 2018; USGS, 2018                                  |



|                                    |         |   |   |   |   |   |                                                                                                                     |
|------------------------------------|---------|---|---|---|---|---|---------------------------------------------------------------------------------------------------------------------|
| <i>Leporinus maculatus</i>         | A       | ✓ |   |   |   |   | Department of the Environment, 2014; Froese and Pauly, 2018                                                         |
| <i>Leporinus multifasciatus</i>    | A       | ✓ |   |   |   |   | Department of the Environment, 2014; Froese and Pauly, 2018                                                         |
| <i>Lestradea stappersii</i>        | A       | ✓ |   |   |   |   | Department of the Environment, 2014; Froese and Pauly, 2018                                                         |
| <i>Leuciscus idus</i>              | B, C, D |   | ✓ |   |   | ✓ | Copp et al., 2007; Mandrak et al., 2014; Froese and Pauler, 2018                                                    |
| <i>Macrogathus aculeatus</i>       | A       | ✓ |   |   |   |   | Department of the Environment, 2014; Froese and Pauly, 2018                                                         |
| <i>Macrogathus siamensis</i>       | A       |   |   |   |   | ✓ | USGS, 2018                                                                                                          |
| <i>Macropodus opercularis</i>      | A, C, D | ✓ |   |   |   | ✓ | Department of the Environment, 2014; Froese and Pauly, 2018                                                         |
| <i>Marcusenius macrolepidotus</i>  | A       | ✓ |   |   |   |   | Department of the Environment, 2014; Froese and Pauly, 2018                                                         |
| <i>Marosatherina ladigesii</i>     | A       | ✓ |   |   |   |   | Department of the Environment, 2014; Froese and Pauly, 2018                                                         |
| <i>Mayaheros urophthalmus</i>      | A       |   |   |   |   | ✓ | Lawson et al., 2017; USGS, 2018                                                                                     |
| <i>Melanochromis auratus</i>       | A       | ✓ |   |   |   |   | Department of the Environment, 2014; Froese and Pauly, 2018                                                         |
| <i>Melanochromis simulans</i>      | A       | ✓ |   |   |   |   | Department of the Environment, 2014; Froese and Pauly, 2018                                                         |
| <i>Melanotaenia fluviatilis</i>    | B, C    |   |   |   |   | ✓ | Tuckett et al., 2017; Hill and Tuckett, 2018                                                                        |
| <i>Mesonauta festivus</i>          | A       | ✓ |   |   |   |   | Department of the Environment, 2014; Froese and Pauly, 2018                                                         |
| <i>Metynnis hypsauchen</i>         | A, C    |   |   | ✓ |   |   | Hu et al., 2013                                                                                                     |
| <i>Metynnis luna</i>               | A       | ✓ |   |   |   |   | Department of the Environment, 2014; Froese and Pauly, 2018                                                         |
| <i>Metynnis sp.*</i>               | A, C    |   |   |   |   | ✓ | USGS, 2018                                                                                                          |
| <i>Micropterus salmoides</i>       | C, D    |   | ✓ |   |   |   | Mandrak et al., 2014; Ministry of Environment and Climate Change Strategy, 2017; Froese and Pauler, 2018            |
| <i>Mikrogeophagus altispinosus</i> | A       | ✓ |   |   |   |   | Department of the Environment, 2014; Froese and Pauly, 2018                                                         |
| <i>Mikrogeophagus ramirezi</i>     | A       | ✓ |   |   |   |   | Department of the Environment, 2014; Froese and Pauly, 2018                                                         |
| <i>Mimagoniates microlepis</i>     | A       | ✓ |   |   |   |   | Department of the Environment, 2014; Froese and Pauly, 2018                                                         |
| <i>Misgurnus anguillicaudatus</i>  | A, C, D |   | ✓ |   | ✓ | ✓ | Mandrak et al., 2014; Ministry of Environment and Climate Change Strategy, 2017; DFO, 2018; Froese and Pauler, 2018 |
| <i>Misgurnus fossilis</i>          | B, C, D |   | ✓ |   |   |   | Mandrak et al., 2014; Froese and Pauler, 2018                                                                       |

|                                     |            |   |  |   |   |   |                                                             |
|-------------------------------------|------------|---|--|---|---|---|-------------------------------------------------------------|
| <i>Misgurnus mizolepis</i>          | C, D       |   |  |   | v |   | Britton et al., 2010; Zięba et al., 2010                    |
| <i>Moenkhausia sanctaefilomenae</i> | A, C       |   |  |   |   | v | USGS, 2018                                                  |
| <i>Moenkhausia xinguensis</i>       | A          | v |  |   |   |   | Department of the Environment, 2014; Froese and Pauly, 2018 |
| <i>Monodactylus argenteus</i>       | A          | v |  |   |   |   | Department of the Environment, 2014; Froese and Pauly, 2018 |
| <i>Monodactylus sebae</i>           | A, C       | v |  |   |   |   | Department of the Environment, 2014; Froese and Pauly, 2018 |
| <i>Monopterus albus</i>             | A, B, C, D |   |  |   |   | v | Tuckett et al., 2017; USGS, 2018                            |
| <i>Myloplus rubripinnis</i>         | A          | v |  |   |   |   | Department of the Environment, 2014; Froese and Pauly, 2018 |
| <i>Nannacara anomala</i>            | A          | v |  |   |   |   | Department of the Environment, 2014; Froese and Pauly, 2018 |
| <i>Nannacara aureocephalus</i>      | A          | v |  |   |   |   | Department of the Environment, 2014; Froese and Pauly, 2018 |
| <i>Nannacara taenia</i>             | A          | v |  |   |   |   | Department of the Environment, 2014; Froese and Pauly, 2018 |
| <i>Nannostomus beckfordi</i>        | A          | v |  |   |   |   | Department of the Environment, 2014; Froese and Pauly, 2018 |
| <i>Nematobrycon palmeri</i>         | A          | v |  |   |   |   | Department of the Environment, 2014; Froese and Pauly, 2018 |
| <i>Neolamprologus brichardi</i>     | A          | v |  |   |   |   | Department of the Environment, 2014; Froese and Pauly, 2018 |
| <i>Neolamprologus cylindricus</i>   | A          | v |  |   |   |   | Department of the Environment, 2014; Froese and Pauly, 2018 |
| <i>Neolamprologus leleupi</i>       | A          | v |  |   |   |   | Department of the Environment, 2014; Froese and Pauly, 2018 |
| <i>Neolamprologus mustax</i>        | A          | v |  |   |   |   | Department of the Environment, 2014; Froese and Pauly, 2018 |
| <i>Nothobranchius rachovii</i>      | A, C       |   |  | v |   |   | Hu et al., 2013                                             |
| <i>Notopterus notopterus</i>        | A          |   |  |   |   | v | Ng and Tan, 2010; Froese and Pauly, 2018                    |
| <i>Oliotius oligolepis</i>          | A          | v |  |   |   |   | Department of the Environment, 2014; Froese and Pauly, 2018 |
| <i>Ophthalmotilapia boops</i>       | A          | v |  |   |   |   | Department of the Environment, 2014; Froese and Pauly, 2018 |
| <i>Oreochromis andersonii</i>       | A, B, C    |   |  | v |   |   | Chen and Ye, 1994                                           |
| <i>Oreochromis aureus</i>           | A          |   |  |   |   | v | Froese and Pauly, 2018                                      |
| <i>Oreochromis mossambicus</i>      | A, B, C    |   |  |   |   | v | Ng and Tan, 2010; Froese and Pauly, 2018; USGS, 2018        |
| <i>Oryzias latipes</i>              | A, C       | v |  |   |   |   | Department of the Environment, 2014; Froese and Pauly, 2018 |
| <i>Osphronemus goramy</i>           | A          |   |  |   | v | v | Ng and Tan, 2010; Guerrero, 2014; Froese and Pauly, 2018    |

|                                    |            |   |   |                                                                         |
|------------------------------------|------------|---|---|-------------------------------------------------------------------------|
| <i>Osteochilus vittatus</i>        | A          | ✓ | ✓ | Ng and Tan, 2010; Froese and Pauly, 2018                                |
| <i>Osteoglossum bicirrhosum</i>    | A          |   | ✓ | Guerrero, 2014; Froese and Pauly, 2018; USGS, 2018                      |
| <i>Otocinclus arnoldi</i>          | A          | ✓ |   | Department of the Environment, 2014; Froese and Pauly, 2018             |
| <i>Oxydoras niger</i>              | A          |   | ✓ | USGS, 2018                                                              |
| <i>Pangasianodon hypophthalmus</i> | A          |   | ✓ | Ng and Tan, 2010; Froese and Pauly, 2018                                |
| <i>Pangio agma</i>                 | A          | ✓ |   | Department of the Environment, 2014; Froese and Pauly, 2018             |
| <i>Pangio anguillaris</i>          | A          | ✓ |   | Department of the Environment, 2014; Froese and Pauly, 2018             |
| <i>Pangio borneensis</i>           | A          | ✓ |   | Department of the Environment, 2014; Froese and Pauly, 2018             |
| <i>Pangio cuneovirgata</i>         | A          | ✓ |   | Department of the Environment, 2014; Froese and Pauly, 2018             |
| <i>Pangio goaensis</i>             | A          | ✓ |   | Department of the Environment, 2014; Froese and Pauly, 2018             |
| <i>Pangio kuhlii</i>               | A, B, C, D | ✓ | ✓ | Department of the Environment, 2014; Froese and Pauly, 2018; USGS, 2018 |
| <i>Pangio longipinnis</i>          | A, B, C    | ✓ |   | Department of the Environment, 2014; Froese and Pauly, 2018             |
| <i>Pangio malayana</i>             | A          | ✓ |   | Department of the Environment, 2014; Froese and Pauly, 2018             |
| <i>Pangio mariarum</i>             | A          | ✓ |   | Department of the Environment, 2014; Froese and Pauly, 2018             |
| <i>Pangio muraeniformis</i>        | A          | ✓ |   | Department of the Environment, 2014; Froese and Pauly, 2018             |
| <i>Pangio myersi</i>               | A          | ✓ |   | Department of the Environment, 2014; Froese and Pauly, 2018             |
| <i>Pangio oblonga</i>              | A          | ✓ |   | Department of the Environment, 2014; Froese and Pauly, 2018             |
| <i>Pangio pangia</i>               | A, B, C    | ✓ |   | Department of the Environment, 2014; Froese and Pauly, 2018             |
| <i>Pangio robiginosa</i>           | A, B, C, D | ✓ |   | Department of the Environment, 2014; Froese and Pauly, 2018             |
| <i>Pangio semicincta</i>           | A          | ✓ |   | Department of the Environment, 2014; Froese and Pauly, 2018             |
| <i>Pangio shelfordii</i>           | A          | ✓ |   | Department of the Environment, 2014; Froese and Pauly, 2018             |
| <i>Pantodon buchholzi</i>          | A          | ✓ |   | Department of the Environment, 2014; Froese and Pauly, 2018             |

|                                     |         |   |  |   |   |   |   |                                                                                                                                              |
|-------------------------------------|---------|---|--|---|---|---|---|----------------------------------------------------------------------------------------------------------------------------------------------|
| <i>Paracheirodon axelrodi</i>       | A       | ✓ |  |   |   |   |   | Department of the Environment, 2014; Froese and Pauly, 2018<br>Ng and Tan, 2010; Department of the Environment, 2014; Froese and Pauly, 2018 |
| <i>Paracheirodon innesi</i>         | A       | ✓ |  |   |   | ✓ |   | Department of the Environment, 2014; Froese and Pauly, 2018                                                                                  |
| <i>Parachela oxygastroides</i>      | A       | ✓ |  |   |   |   |   | Department of the Environment, 2014; Froese and Pauly, 2018                                                                                  |
| <i>Parachromis managuensis</i>      | A       |   |  | ✓ |   | ✓ | ✓ | Ng and Tan, 2010; Guerrero, 2014; Froese and Pauly, 2018; USGS, 2018                                                                         |
| <i>Paracyprichromis nigripinnis</i> | A       | ✓ |  |   |   |   |   | Department of the Environment, 2014; Froese and Pauly, 2018                                                                                  |
| <i>Parambassis apogonoides</i>      | A       | ✓ |  |   |   |   |   | Department of the Environment, 2014; Froese and Pauly, 2018                                                                                  |
| <i>Parambassis baculis</i>          | A, C    | ✓ |  |   |   |   |   | Department of the Environment, 2014; Froese and Pauly, 2018                                                                                  |
| <i>Parambassis lala</i>             | A, B, C | ✓ |  |   |   |   |   | Department of the Environment, 2014; Froese and Pauly, 2018                                                                                  |
| <i>Parambassis macrolepis</i>       | A       | ✓ |  |   |   |   |   | Department of the Environment, 2014; Froese and Pauly, 2018                                                                                  |
| <i>Parambassis ranga</i>            | A, B, C | ✓ |  | ✓ |   |   |   | Department of the Environment, 2014; Froese and Pauly, 2018; Wei and Luo, 2018                                                               |
| <i>Parambassis siamensis</i>        | A       | ✓ |  |   |   |   |   | Department of the Environment, 2014; Froese and Pauly, 2018                                                                                  |
| <i>Paraneetroplus melanurus</i>     | A       |   |  |   |   | ✓ |   | Ng and Tan, 2010; McMahan et al., 2011                                                                                                       |
| <i>Parosphromenus deissneri</i>     | A       | ✓ |  |   |   |   |   | Department of the Environment, 2014; Froese and Pauly, 2018                                                                                  |
| <i>Pelmatolapia mariae</i>          | A       |   |  |   |   |   | ✓ | USGS, 2018                                                                                                                                   |
| <i>Pelvicachromis pulcher</i>       | A       | ✓ |  |   |   |   |   | Department of the Environment, 2014; Froese and Pauly, 2018                                                                                  |
| <i>Pelvicachromis subocellatus</i>  | A       | ✓ |  |   |   |   |   | Department of the Environment, 2014; Froese and Pauly, 2018                                                                                  |
| <i>Pelvicachromis taeniatus</i>     | A       | ✓ |  |   |   |   |   | Department of the Environment, 2014; Froese and Pauly, 2018                                                                                  |
| <i>Pethia conchonius</i>            | A, B, C | ✓ |  | ✓ | ✓ |   | ✓ | Rixon et al., 2005; Ng and Tan, 2010; Hu et al., 2013; Tuckett et al., 2017; DFO, 2018; Froese and Pauly, 2018; USGS, 2018                   |
| <i>Pethia cumingii</i>              | A       | ✓ |  |   |   |   |   | Department of the Environment, 2014; Froese and Pauly, 2018                                                                                  |
| <i>Pethia gelius</i>                | A, C    |   |  |   |   |   | ✓ | USGS, 2018                                                                                                                                   |
| <i>Pethia nigrofasciata</i>         | A       | ✓ |  |   |   |   |   | Department of the Environment, 2014; Froese and Pauly, 2018                                                                                  |

|                                      |         |   |  |   |  |   |   |   |  |  |  |   |   |  |  |  |  |   |                                                                                                                                                                                                                 |
|--------------------------------------|---------|---|--|---|--|---|---|---|--|--|--|---|---|--|--|--|--|---|-----------------------------------------------------------------------------------------------------------------------------------------------------------------------------------------------------------------|
| <i>Pethia ticto</i>                  | A       | ✓ |  |   |  |   |   |   |  |  |  |   |   |  |  |  |  |   | Department of the Environment, 2014; Froese and Pauly, 2018                                                                                                                                                     |
| <i>Petitella georgiae</i>            | A       | ✓ |  |   |  |   |   |   |  |  |  |   |   |  |  |  |  |   | Department of the Environment, 2014; Froese and Pauly, 2018                                                                                                                                                     |
| <i>Petrochromis trewavasae</i>       | A       | ✓ |  |   |  |   |   |   |  |  |  |   |   |  |  |  |  |   | Department of the Environment, 2014; Froese and Pauly, 2018                                                                                                                                                     |
| <i>Phenacogrammus interruptus</i>    | A       | ✓ |  |   |  |   |   |   |  |  |  |   |   |  |  |  |  |   | Department of the Environment, 2014; Froese and Pauly, 2018                                                                                                                                                     |
| <i>Phractocephalus hemiliopterus</i> | A       |   |  |   |  |   |   |   |  |  |  |   |   |  |  |  |  | ✓ | USGS, 2018                                                                                                                                                                                                      |
| <i>Piaractus brachypomus</i>         | A       |   |  |   |  |   | ✓ |   |  |  |  |   |   |  |  |  |  | ✓ | Guerrero, 2014; Froese and Pauly, 2018; USGS, 2018                                                                                                                                                              |
| <i>Piaractus mesopotamicus</i>       | A, C    |   |  |   |  |   |   |   |  |  |  |   |   |  |  |  |  | ✓ | USGS, 2018                                                                                                                                                                                                      |
| <i>Pimelodus ornatus</i>             | A       | ✓ |  |   |  |   |   |   |  |  |  |   |   |  |  |  |  |   | Department of the Environment, 2014; Froese and Pauly, 2018                                                                                                                                                     |
| <i>Pimelodus pictus</i>              | A       | ✓ |  |   |  |   |   |   |  |  |  |   |   |  |  |  |  |   | Department of the Environment, 2014; Froese and Pauly, 2018                                                                                                                                                     |
| <i>Pimephales promelas</i>           | B, C, D |   |  | ✓ |  | ✓ |   |   |  |  |  |   | ✓ |  |  |  |  | ✓ | Scott and Crossman, 1973; Copp et al., 2007; Verreycken et al., 2007; Godard et al., 2013; Mandrak et al., 2014; Ministry of Environment and Climate Change Strategy, 2017; Froese and Pauler, 2018; USGS, 2018 |
| <i>Poecilia latipinna</i>            | A, B, C | ✓ |  |   |  | ✓ |   | ✓ |  |  |  | ✓ |   |  |  |  |  | ✓ | Rixon et al., 2005; Ng and Tan, 2010; Hu et al., 2013; Guerrero, 2014; DFO, 2018; Froese and Pauly, 2018; USGS, 2018                                                                                            |
| <i>Poecilia latipunctata</i>         | A, C    |   |  |   |  |   |   |   |  |  |  |   |   |  |  |  |  | ✓ | USGS, 2018                                                                                                                                                                                                      |
| <i>Poecilia reticulata</i>           | A       | ✓ |  |   |  |   |   | ✓ |  |  |  | ✓ |   |  |  |  |  | ✓ | Ng and Tan, 2010; Tuckett et al., 2017; Froese and Pauly, 2018; Hill and Tuckett, 2018                                                                                                                          |
| <i>Poecilia sphenops</i>             | A, C    | ✓ |  |   |  |   |   | ✓ |  |  |  | ✓ |   |  |  |  |  | ✓ | Ng and Tan, 2010; Tuckett et al., 2017; Froese and Pauly, 2018; Hill and Tuckett, 2018                                                                                                                          |
| <i>Poecilia velifera</i>             | A       | ✓ |  |   |  |   |   |   |  |  |  | ✓ |   |  |  |  |  |   | Ng and Tan, 2010; Department of the Environment, 2014; Froese and Pauly, 2018                                                                                                                                   |
| <i>Poecilocharax weitzmani</i>       | A       | ✓ |  |   |  |   |   |   |  |  |  |   |   |  |  |  |  |   | Department of the Environment, 2014; Froese and Pauly, 2018                                                                                                                                                     |
| <i>Polypterus delhezi</i>            | A       |   |  |   |  |   |   |   |  |  |  |   |   |  |  |  |  | ✓ | USGS, 2018                                                                                                                                                                                                      |
| <i>Pomoxis nigromaculatus</i>        | A, C, D |   |  |   |  |   | ✓ |   |  |  |  |   |   |  |  |  |  |   | Scott and Crossman, 1973; Mandrak et al., 2014; Ministry of Environment and Climate Change Strategy, 2017; Froese and Pauler, 2018; USGS, 2018                                                                  |

|                                       |         |   |   |   |   |   |                                                                                                  |
|---------------------------------------|---------|---|---|---|---|---|--------------------------------------------------------------------------------------------------|
| <i>Potamotrygon motoro</i>            | A, B, C |   | ✓ |   | ✓ |   | Ng and Tan, 2010; Hu et al., 2013; Froese and Pauly, 2018                                        |
| <i>Prionobrama filigera</i>           | A       | ✓ |   |   |   |   | Department of the Environment, 2014; Froese and Pauly, 2018                                      |
| <i>Pristella maxillaris</i>           | A       | ✓ |   |   |   |   | Department of the Environment, 2014; Froese and Pauly, 2018                                      |
| <i>Protopterus annectens</i>          | A, C    |   | ✓ |   |   |   | Hu et al., 2013                                                                                  |
| <i>Pseudogastromyzon myersi</i>       | A       | ✓ |   |   |   |   | Department of the Environment, 2014; Froese and Pauly, 2018                                      |
| <i>Pseudomystus siamensis</i>         | A       | ✓ |   |   |   |   | Department of the Environment, 2014; Froese and Pauly, 2018                                      |
| <i>Pterodoras granulosus</i>          | A, C    |   |   |   |   | ✓ | USGS, 2018                                                                                       |
| <i>Pterophyllum scalare</i>           | A       | ✓ |   |   |   | ✓ | Department of the Environment, 2014; Froese and Pauly, 2018; USGS, 2018                          |
| <i>Pterygoplichthys anisitsi</i>      | C       |   |   |   |   | ✓ | USGS, 2018                                                                                       |
| <i>Pterygoplichthys disjunctivus</i>  | A, C    |   | ✓ | ✓ |   | ✓ | Ng and Tan, 2010; Guerrero 2014; Wei. et al., 2017; Froese and Pauly, 2018; USGS, 2018           |
| <i>Pterygoplichthys joselimaianus</i> | A       |   |   |   |   | ✓ | Froese and Pauly, 2018                                                                           |
| <i>Pterygoplichthys multiradiatus</i> | A, C    |   | ✓ |   |   | ✓ | Ng and Tan, 2010; Froese and Pauly, 2018                                                         |
| <i>Pterygoplichthys pardalis</i>      | A       |   |   | ✓ |   | ✓ | Li et al., 2013; Wei et al., 2017; USGS, 2018                                                    |
| <i>Puntigrus partipentazona</i>       | A       | ✓ |   |   |   | ✓ | Ng and Tan, 2010; Guerrero, 2014; Froese and Pauly, 2018; USGS, 2018                             |
| <i>Puntigrus tetrazona</i>            | A       | ✓ |   | ✓ |   | ✓ | Froese and Pauly, 2018                                                                           |
| <i>Puntius bimaculatus</i>            | A, B, C | ✓ |   |   |   |   | Ng and Tan, 2010; Froese and Pauly, 2018                                                         |
| <i>Puntius titteya</i>                | A       | ✓ |   |   |   |   | Froese and Pauly, 2018                                                                           |
| <i>Puntius vittatus</i>               | A       | ✓ |   |   |   |   | Guerrero, 2014; Tuckett et al., 2017; Froese and Pauly, 2018; Hill and Tuckett, 2018; USGS, 2018 |
| <i>Pygocentrus nattereri</i>          | A, C    |   | ✓ | ✓ | ✓ | ✓ | Department of the Environment, 2014; Froese and Pauly, 2018                                      |
| <i>Rasbora argyrotaenia</i>           | A       | ✓ |   |   |   |   | Department of the Environment, 2014; Froese and Pauly, 2018                                      |
| <i>Rasbora borapetensis</i>           | A       | ✓ |   |   |   | ✓ | Department of the Environment, 2014; Froese and Pauly, 2018                                      |

|                                  |            |   |  |   |   |   |   |   |                                                             |
|----------------------------------|------------|---|--|---|---|---|---|---|-------------------------------------------------------------|
| <i>Rasbora caudimaculata</i>     | A          | ✓ |  |   |   |   |   |   | Department of the Environment, 2014; Froese and Pauly, 2018 |
| <i>Rasbora dusonensis</i>        | A          | ✓ |  |   |   |   |   |   | Department of the Environment, 2014; Froese and Pauly, 2018 |
| <i>Rasbora einthovenii</i>       | A          | ✓ |  |   |   |   |   |   | Department of the Environment, 2014; Froese and Pauly, 2018 |
| <i>Rasbora elegans</i>           | A          | ✓ |  |   |   |   |   |   | Department of the Environment, 2014; Froese and Pauly, 2018 |
| <i>Rasbora kalochroma</i>        | A          | ✓ |  |   |   |   |   |   | Department of the Environment, 2014; Froese and Pauly, 2018 |
| <i>Rasbora leptosoma</i>         | A          | ✓ |  |   |   |   |   |   | Department of the Environment, 2014; Froese and Pauly, 2018 |
| <i>Rasbora sarawakensis</i>      | A          | ✓ |  |   |   |   |   |   | Department of the Environment, 2014; Froese and Pauly, 2018 |
| <i>Rasbora steineri</i>          | A          | ✓ |  |   |   |   |   |   | Department of the Environment, 2014; Froese and Pauly, 2018 |
|                                  |            |   |  |   |   |   |   |   | Ng and Tan, 2010;                                           |
| <i>Rasbora trilineata</i>        | A          | ✓ |  |   |   |   | ✓ |   | Department of the Environment, 2014; Froese and Pauly, 2018 |
| <i>Rasboroides vaterifloris</i>  | A          | ✓ |  |   |   |   |   |   | Department of the Environment, 2014; Froese and Pauly, 2018 |
| <i>Rhamdia quelen</i>            | A, B, C    |   |  |   |   |   |   | ✓ | USGS, 2018                                                  |
| <i>Rhodeus amarus</i>            | C, D       | ✓ |  |   |   |   |   | ✓ | Copp et al., 2007; Froese and Pauly, 2018                   |
| <i>Rhodeus sericeus</i>          | D          | ✓ |  |   |   |   |   |   | Department of the Environment, 2014; Froese and Pauly, 2018 |
| <i>Rocio octofasciata</i>        | A          |   |  |   |   |   |   | ✓ | Lawson et al., 2017; Tuckett et al., 2017; USGS, 2018       |
| <i>Sahyadria denisonii</i>       | A, B, C, D |   |  | ✓ | ✓ |   |   |   | Hu et al., 2013; DFO, 2018;                                 |
| <i>Sarotherodon melanotheron</i> | A, B       |   |  |   |   |   |   | ✓ | Froese and Pauly, 2018                                      |
|                                  |            |   |  |   |   |   |   |   | USGS, 2018                                                  |
| <i>Satanoperca jurupari</i>      | A          |   |  |   |   |   | ✓ |   | Ng and Tan, 2010; Froese and Pauly, 2018                    |
| <i>Sawbwa resplendens</i>        | A          | ✓ |  |   |   |   |   |   | Froese and Pauly, 2018                                      |
|                                  |            |   |  |   |   |   |   |   | Department of the Environment, 2014; Froese and Pauly, 2018 |
| <i>Scleropages formosus</i>      | A          |   |  |   |   | ✓ |   | ✓ | Ng and Tan, 2010; Guerrero, 2014; Froese and Pauly, 2018    |
| <i>Scleropages leichardti</i>    | B, C       |   |  |   | ✓ |   |   |   | 2018                                                        |
| <i>Scobinancistrus sp.</i>       | A, C       |   |  |   | ✓ |   |   |   | Lou, 2000; Hu et al., 2013                                  |
|                                  |            |   |  |   |   |   |   |   | Wei and Luo, 2018                                           |
| <i>Secutor ruconius</i>          | A, B, C    | ✓ |  |   |   |   |   |   | Department of the Environment, 2014; Froese and Pauly, 2018 |
| <i>Semaprochilodus insignis</i>  | A          | ✓ |  |   |   |   |   |   | Department of the Environment, 2014; Froese and Pauly, 2018 |
| <i>Semaprochilodus taeniurus</i> | A          | ✓ |  |   |   |   |   |   | Department of the Environment, 2014; Froese and Pauly, 2018 |

|                                     |            |   |   |   |   |                                                                             |
|-------------------------------------|------------|---|---|---|---|-----------------------------------------------------------------------------|
| <i>Serrasalmus rhombeus</i>         | A          |   |   |   | v | USGS, 2018                                                                  |
| <i>Sicyopus zosterophorus</i>       | A, C       |   | v |   |   | Wei and Luo, 2018                                                           |
| <i>Silurus glanis</i>               | B, C, D    |   | v |   |   | Mandrak et al., 2014; Froese and Pauly, 2018                                |
| <i>Siniperca chuatsi</i>            | A, B, C, D |   | v |   |   | Mandrak et al., 2014; Froese and Pauly, 2018                                |
| <i>Spathodus erythron</i>           | A          | v |   |   |   | Department of the Environment, 2014; Froese and Pauly, 2018                 |
| <i>Sphaerichthys osphromenoides</i> | A          | v |   |   |   | Department of the Environment, 2014; Froese and Pauly, 2018                 |
| <i>Striuntius lineatus</i>          | A          | v |   |   |   | Department of the Environment, 2014; Froese and Pauly, 2018                 |
| <i>Sturisomatichthys panamense</i>  | A          | v |   |   |   | Department of the Environment, 2014; Froese and Pauly, 2018                 |
| <i>Symphysodon discus</i>           | A          | v |   |   |   | Department of the Environment, 2014; Froese and Pauly, 2018                 |
| <i>Synodontis decorus</i>           | A          | v |   |   |   | Department of the Environment, 2014; Froese and Pauly, 2018                 |
| <i>Synodontis multipunctatus</i>    | A          | v |   |   |   | Department of the Environment, 2014; Froese and Pauly, 2018                 |
| <i>Synodontis nigriventris</i>      | A          | v |   |   |   | Department of the Environment, 2014; Froese and Pauly, 2018                 |
| <i>Systemus asoka</i>               | A          | v |   |   |   | Department of the Environment, 2014; Froese and Pauly, 2018                 |
| <i>Tanganicodus irsacae</i>         | A          | v |   |   |   | Department of the Environment, 2014; Froese and Pauly, 2018                 |
| <i>Tanichthys albonubes</i>         | A, B, C, D | v |   | v |   | Rixon et al., 2005; Gertzen et al., 2008; DFO, 2018; Froese and Pauly, 2018 |
| <i>Tateurndina ocellicauda</i>      | A          | v |   |   |   | Department of the Environment, 2014; Froese and Pauly, 2018                 |
| <i>Tetragonopterus rarus</i>        | A          | v |   |   |   | Department of the Environment, 2014; Froese and Pauly, 2018                 |
| <i>Thayeria obliqua</i>             | A          | v |   |   |   | Department of the Environment, 2014; Froese and Pauly, 2018                 |
| <i>Theriodes sandakanensis</i>      | A          | v |   |   |   | Department of the Environment, 2014; Froese and Pauly, 2018                 |
| <i>Thoracocharax securis</i>        | A          | v |   |   |   | Department of the Environment, 2014; Froese and Pauly, 2018                 |
| <i>Thoracocharax stellatus</i>      | A          | v |   |   |   | Department of the Environment, 2014; Froese and Pauly, 2018                 |
| <i>Thorichthys meeki</i>            | A          |   |   |   | v | Ng and Tan, 2010; Froese and Pauly, 2018; USGS, 2018                        |
| <i>Tilapia sparrmanii</i>           | A, B, C    |   |   |   | v | Froese and Pauly, 2018                                                      |
|                                     |            |   |   |   |   | USGS, 2018                                                                  |



|                                    |         |   |   |   |   |   |                                                                                                                |
|------------------------------------|---------|---|---|---|---|---|----------------------------------------------------------------------------------------------------------------|
| <i>Toxotes jaculatrix</i>          | A       | ✓ |   |   |   |   | Department of the Environment, 2014; Froese and Pauly, 2018                                                    |
| <i>Trachelyopterus fisheri</i>     | A       | ✓ |   |   |   |   | Department of the Environment, 2014; Froese and Pauly, 2018                                                    |
| <i>Trichogaster chuna</i>          | A, B, C | ✓ |   |   |   | ✓ | Department of the Environment, 2014; Tuckett et al., 2017; Froese and Pauly, 2018                              |
| <i>Trichogaster fasciata</i>       | A, B, C | ✓ |   |   |   |   | Department of the Environment, 2014; Froese and Pauly, 2018                                                    |
| <i>Trichogaster labiosa</i>        | A       | ✓ |   |   |   |   | Department of the Environment, 2014; Froese and Pauly, 2018                                                    |
| <i>Trichogaster lalius</i>         | A, B, C | ✓ | ✓ |   |   | ✓ | Hu et al., 2013; Department of the Environment, 2014; Tuckett et al., 2017; Froese and Pauly, 2018; USGS, 2018 |
| <i>Trichogaster microlepis</i>     | A       | ✓ |   |   |   | ✓ | Ng and Tan, 2010; Froese and Pauly, 2018                                                                       |
| <i>Trichopodus leerii</i>          | A       | ✓ |   |   | ✓ |   | Froese and Pauly, 2018                                                                                         |
| <i>Trichopodus pectoralis</i>      | A       |   |   |   | ✓ | ✓ | Department of the Environment, 2014; Guerrero, 2014; Froese and Pauly, 2018; USGS, 2018                        |
| <i>Trichopodus trichopterus</i>    | A, C    | ✓ | ✓ | ✓ |   | ✓ | Ng and Tan, 2010; Guerrero, 2014; Froese and Pauly, 2018                                                       |
| <i>Trichopsis pumila</i>           | A       | ✓ |   |   |   |   | Hu et al., 2013; Guerrero, 2014; Tuckett et al., 2017; Froese and Pauly, 2018; USGS, 2018                      |
| <i>Trichopsis vittata</i>          | A       | ✓ |   |   |   | ✓ | Department of the Environment, 2014; Froese and Pauly, 2018                                                    |
| <i>Trichromis salvini</i>          | A       |   |   |   |   | ✓ | Department of the Environment, 2014; Froese and Pauly, 2018; USGS, 2018                                        |
| <i>Trigonopoma pauciperforatum</i> | A       | ✓ |   |   |   |   | Department of the Environment, 2014; Froese and Pauly, 2018                                                    |
| <i>Trigonostigma hengeli</i>       | A       | ✓ |   |   |   |   | Department of the Environment, 2014; Froese and Pauly, 2018                                                    |
| <i>Trigonostigma heteromorpha</i>  | A       | ✓ |   |   |   |   | Department of the Environment, 2014; Froese and Pauly, 2018                                                    |
| <i>Trinectes maculatus</i>         | A, C    | ✓ |   |   |   |   | Department of the Environment, 2014; Froese and Pauly, 2018                                                    |
| <i>Triporthus albus</i>            | A       | ✓ |   |   |   |   | Department of the Environment, 2014; Froese and Pauly, 2018                                                    |
| <i>Tropheus moorii</i>             | A       | ✓ |   |   |   |   | Department of the Environment, 2014; Froese and Pauly, 2018                                                    |
| <i>Umbra krameri</i>               | C, D    |   |   |   |   | ✓ | Department of the Environment, 2014; Froese and Pauly, 2018                                                    |

|                              |         |   |   |   |   |   |                                                                                                                                             |
|------------------------------|---------|---|---|---|---|---|---------------------------------------------------------------------------------------------------------------------------------------------|
| <i>Umbra pygmaea</i>         | C, D    |   | ✓ |   | ✓ |   | Witkowski and Grabowska, 2012; Verreycken et al., 2010                                                                                      |
| <i>Vieja melanura</i>        | A       |   |   |   |   | ✓ | USGS, 2018                                                                                                                                  |
|                              |         |   |   |   |   |   | Huang et al., 2002; Ng and Tan, 2010; Lawson et al., 2017; Tuckett et al., 2017; Froese and Pauly, 2018; Hill and Tuckett, 2018; USGS, 2018 |
| <i>Xiphophorus hellerii</i>  | A, C    | ✓ |   | ✓ |   | ✓ |                                                                                                                                             |
|                              |         |   |   |   |   |   | Kang, 2004; Ng and Tan, 2010; Lawson et al., 2017; Tuckett et al., 2017; Froese and Pauly, 2018; Hill and Tuckett, 2018; USGS, 2018         |
| <i>Xiphophorus maculatus</i> | A, C    | ✓ |   | ✓ |   | ✓ | Ng and Tan, 2010; Lawson et al., 2017; Tuckett et al., 2017; DFO, 2018; Froese and Pauly, 2018; Hill and Tuckett, 2018; USGS, 2018          |
| <i>Xiphophorus variatus</i>  | A, B, C | ✓ |   | ✓ |   | ✓ |                                                                                                                                             |
